# Supplementary material for: Enhanced Photodetection Range from Visible to Shortwave Infrared Light by ReSe2/MoTe2 van der Waals Heterostructure
Source: MDPI journal article supplement (doi:10.3390/nano12152664), 2022-08-03
Supplement: s1 [file s1]

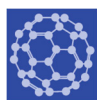

Supplementary Materials for:

# Enhanced Photodetection Range from Visible to Shortwave Infrared Light by ReSe<sub>2</sub>/MoTe<sub>2</sub> van der Waals Heterostructure

Zhitao Lin <sup>1,†</sup>, Wenbiao Zhu <sup>2,†</sup>, Yonghong Zeng <sup>2</sup>, Yiqing Shu <sup>1</sup>, Haiguo Hu <sup>2</sup>, Weicheng Chen <sup>3</sup> and Jianqing Li <sup>1,\*</sup>

<sup>1</sup> School of computer science and engineering, Macau University of Science and Technology, Avenida Wai Long, Taipa, Macao 999078, China; 1809853gii30001@student.must.edu.mo (Z.L.); 1909853yii30001@student.must.edu.mo (Y.S.)

<sup>2</sup> Institute of Microscale Optoelectronics, Collaborative Innovation Centre for Optoelectronic Science & Technology, Key Laboratory of Optoelectronic Devices and Systems of Ministry of Education and Guangdong Province, College of Physics and Optoelectronic Engineering, Shenzhen Key Laboratory of Micro-Nano Photonic Information Technology, Guangdong Laboratory of Artificial Intelligence and Digital Economy (SZ), Shenzhen University, Shenzhen 518060, China; 1910454024@email.szu.edu.cn (W.Z.); zengyonghong777@163.com (Y.Z.); huhaiguo916@163.com (H.H.)

<sup>3</sup> Guangdong-HongKong-Macao Joint Laboratory for Intelligent Micro-Nano Optoelectronic Technology, Foshan University, Foshan 528225, China; chenwch@fosu.edu.cn

\* Correspondence: jqli@must.edu.mo

† These authors contributed equally to this work.

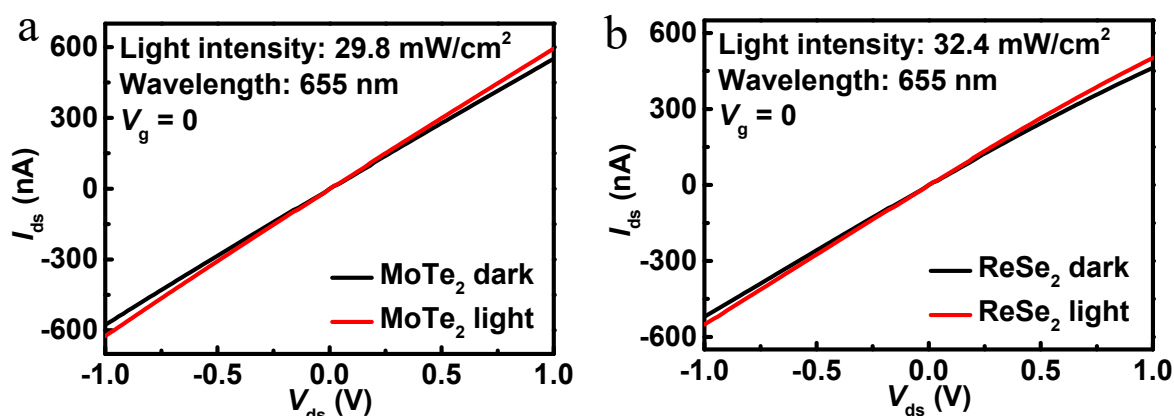

Figure S1.  $I$ - $V$  characteristics of the individual (a) ReSe<sub>2</sub> nanosheets and (b) MoTe<sub>2</sub> nanosheets under dark and red light illumination.

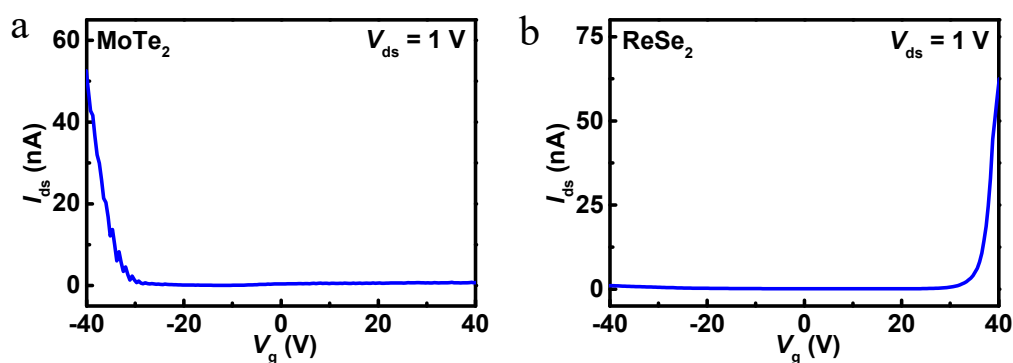

Figure S2.  $I_{ds}$ - $V_g$  curves of the single MoTe<sub>2</sub> (a) and ReSe<sub>2</sub> (b) nanosheets FET.

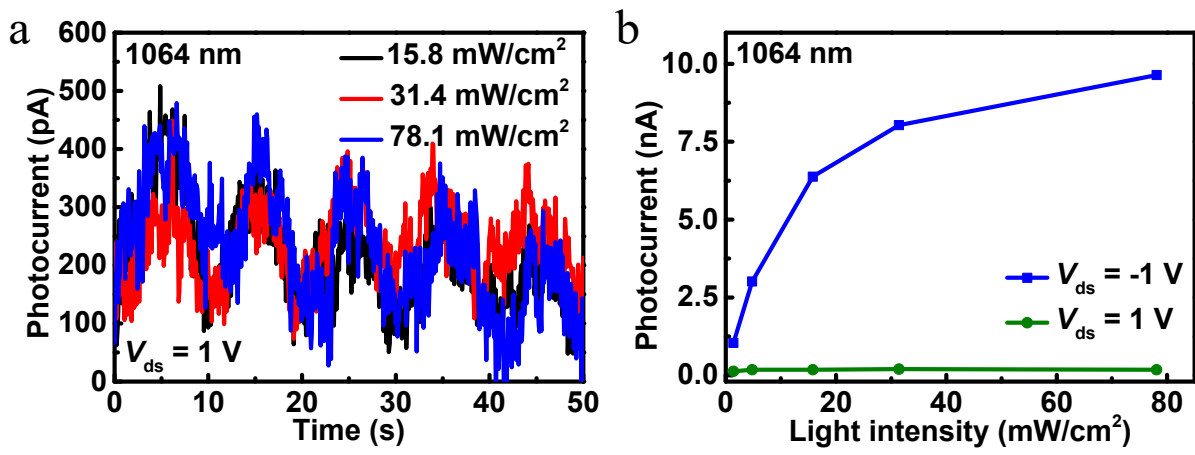

**Figure S3.** (a) Time-dependent photoresponse of the ReSe<sub>2</sub>/MoTe<sub>2</sub> heterojunction under varied light intensities (1064 nm,  $V_{ds} = 1$  V), (b) The photocurrent as functions of light intensity under 1064 nm incident light ( $V_{ds} = \pm 1$  V).

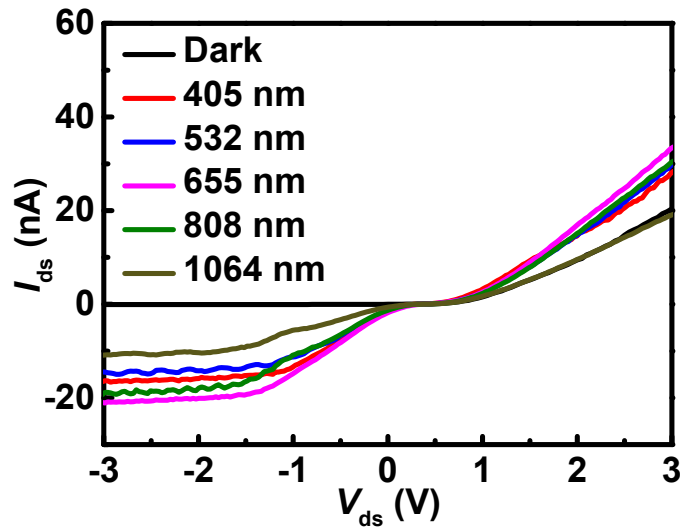

**Figure S4.**  $I$ - $V$  curves of the photodetector under light illumination with different wavelengths.

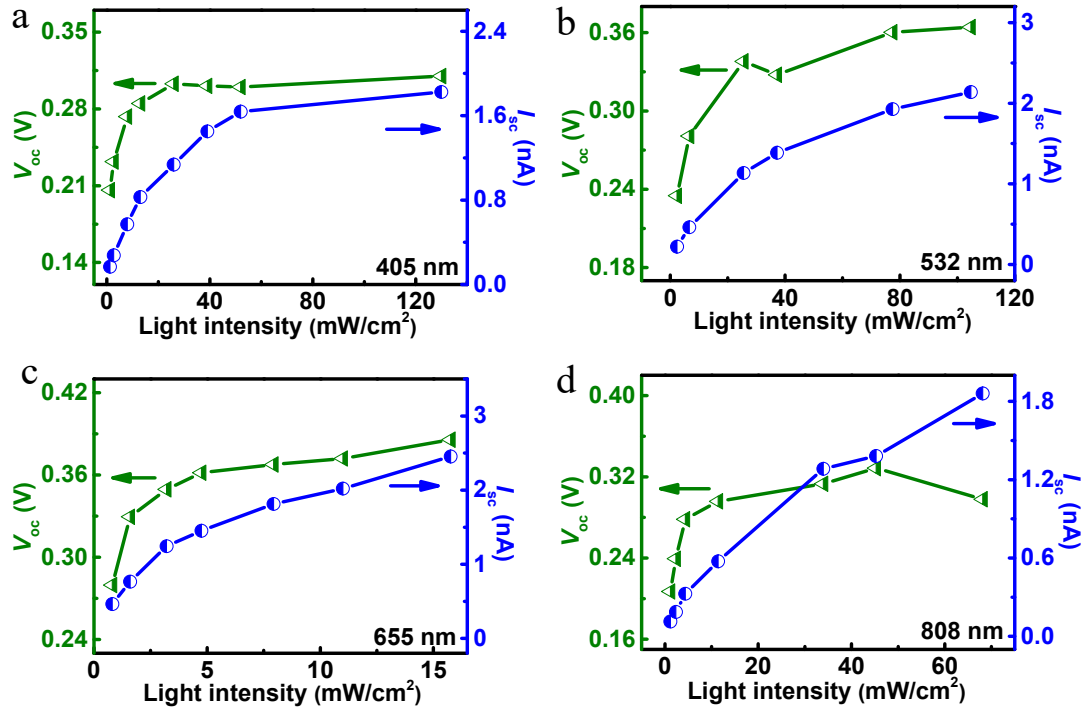

**Figure S5.** Extracted open-circuit voltage ( $V_{oc}$ , left axis) and short-circuit current ( $I_{sc}$ , right axis) as functions of light intensity under different wavelengths of 405 nm (a), 532 nm (b), 655 nm (c), and 808 nm (d).

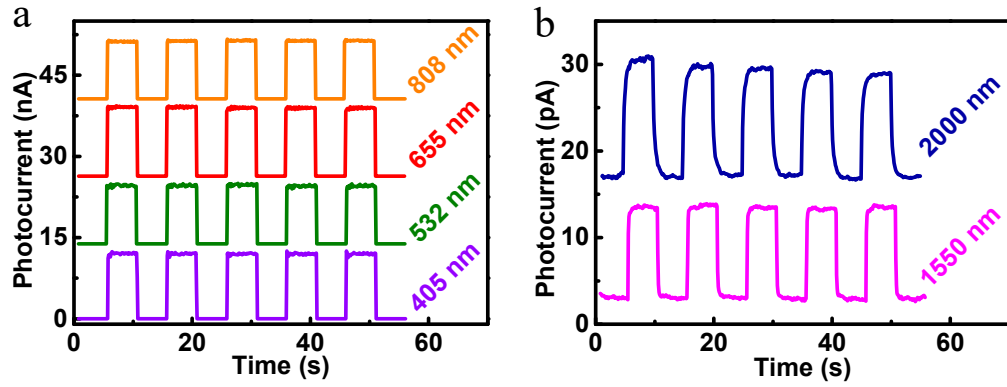

**Figure S6.** (a–b) Time-dependent photoresponse of the  $\text{ReSe}_2/\text{MoTe}_2$  heterojunction under various wavelengths from visible to shortwave infrared ( $V_{ds}=-1$  V and  $V_g=0$  V). Measurements were carried out in the atmosphere at room temperature.

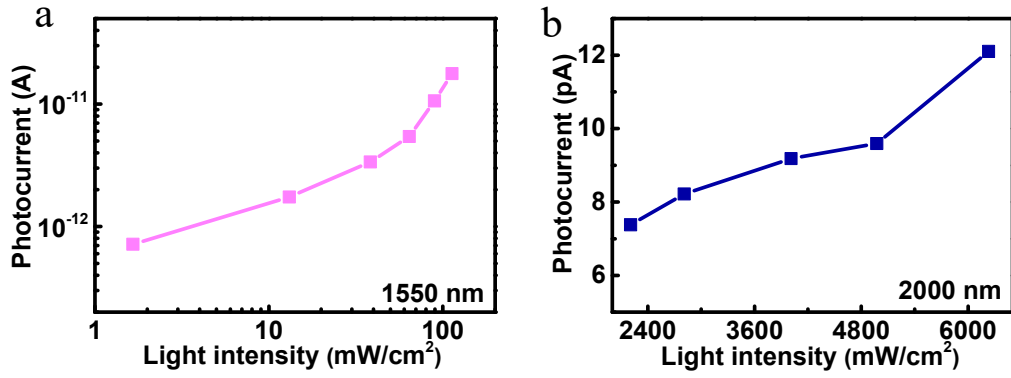

Figure S7. (a) Logarithmic plot of the photocurrent as functions of light intensity under 1550 nm incident light. (b) The photocurrent as functions of light intensity under 2000 nm incident light.

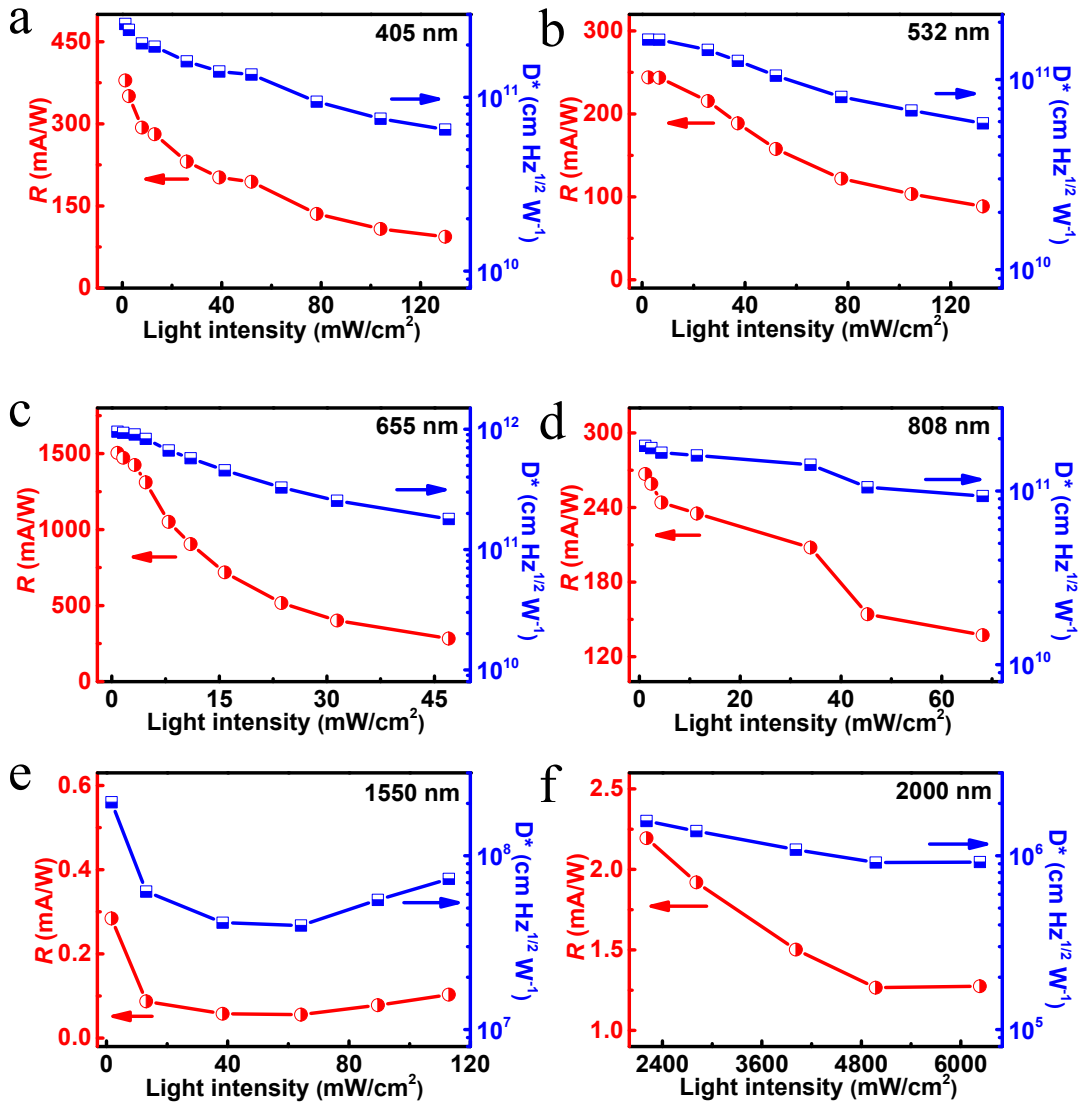

Figure S8. Responsivity and specific detectivity of the  $\text{ReSe}_2/\text{MoTe}_2$  heterojunction photodetector as functions of light intensity under different wavelengths of (a) 405 nm, (b) 532 nm, (c) 655 nm, (d) 808 nm, (e) 1550 nm, (f) 2000 nm.

**Table S1.** Key parameter comparison list of ReSe<sub>2</sub>/MoTe<sub>2</sub> heterojunction photodetector.

| Structure                            | Thickness (nm) | Wavelength (nm) | Responsivity (A/W)   | Detectivity (Jones)   | Rise/Fall time (ms) | Ref       |
|--------------------------------------|----------------|-----------------|----------------------|-----------------------|---------------------|-----------|
| ReSe <sub>2</sub> /MoTe <sub>2</sub> | 15.1/8.4       | 405-2000        | 1.05                 | 6.66×10 <sup>11</sup> | 5.6/4.2             | This work |
| ReS <sub>2</sub> /ReSe <sub>2</sub>  | 64/48          | 400-550         | 2.1×10 <sup>2</sup>  | NA                    | 400                 | [1]       |
| ReSe <sub>2</sub> /MoS <sub>2</sub>  | 60/7           | 633             | 6.75                 | NA                    | NA                  | [2]       |
| InSe/ReSe <sub>2</sub>               | 10.7/2.9       | 300-980         | 53.29                | 4.70×10 <sup>11</sup> | 0.36/0.39           | [3]       |
| WSe <sub>2</sub> /ReSe <sub>2</sub>  | 6/50           | 405-980         | 0.57                 | NA                    | NA                  | [4]       |
| BP/ReSe <sub>2</sub>                 | 5.9/6.5        | 405-633         | 0.44                 | NA                    | 18.0/20.2           | [5]       |
| BP/h-BN/ReSe <sub>2</sub>            | 5.8/0.91/10    | 532             | 0.012                | 28.9×10 <sup>12</sup> | NA                  | [6]       |
| GeSe/ReSe <sub>2</sub>               | 7/9            | 405-1550        | 2.89×10 <sup>5</sup> | 4.91×10 <sup>13</sup> | 0.016/<br>0.02      | [7]       |
| ReS <sub>2</sub> /ReSe <sub>2</sub>  | 6.5/5.5        | 350-980         | 126.56               | 1.76×10 <sup>11</sup> | 0.006/<br>0.0089    | [8]       |
| ReSe <sub>2</sub> /WSe <sub>2</sub>  | 12/25          | 520             | 0.28                 | 1.1×10 <sup>12</sup>  | NA                  | [9]       |
| MoTe <sub>2</sub> /ReSe <sub>2</sub> | 5.5/5          | 455-980         | 5.6×10 <sup>2</sup>  | 8.1×10 <sup>13</sup>  | NA                  | [10]      |
| Gr/ReSe <sub>2</sub> /Gr             | 14.5           | 220-1064        | 1.5×10 <sup>7</sup>  | NA                    | 5420/<br>2980       | [11]      |

## References

1. Cho, A.-J.; Namgung, S. D.; Kim, H.; Kwon, J.-Y., Electric and photovoltaic characteristics of a multi-layer ReS<sub>2</sub>/ReSe<sub>2</sub> heterostructure. *APL Materials* **2017**, 5 (7), 076101.
2. Wang, X.; Huang, L.; Peng, Y.; Huo, N.; Wu, K.; Xia, C.; Wei, Z.; Tongay, S.; Li, J., Enhanced rectification, transport property and photocurrent generation of multilayer ReSe<sub>2</sub>/MoS<sub>2</sub> p-n heterojunctions. *Nano Research* **2015**, 9 (2), 507-516.
3. Du, C.; Gao, H.; Du, W.; Li, J.; Leng, J.; Li, K.; Wang, W., High responsivity and broadband polarized photodetectors based on InSe/ReSe<sub>2</sub> van der Waals heterostructures. *Journal of Alloys and Compounds* **2022**, 165586.
4. Ahn, J.; Ko, K.; Kyhm, J. H.; Ra, H. S.; Bae, H.; Hong, S.; Kim, D. Y.; Jang, J.; Kim, T. W.; Choi, S.; Kang, J. H.; Kwon, N.; Park, S.; Ju, B. K.; Poon, T. C.; Park, M. C.; Im, S.; Hwang, D. K., Near-Infrared Self-Powered Linearly Polarized Photodetection and Digital Incoherent Holography Using WSe<sub>2</sub>/ReSe<sub>2</sub> van der Waals Heterostructure. *ACS Nano* **2021**, 15(11), 17917-17925.
5. Shih, C.-C.; Huang, M.-H.; Wan, C.-K.; Jian, W.-B.; Kono, K.; Lin, Y.-F.; Ho, C.-H., Tuning Interface Barrier in 2D BP/ReSe<sub>2</sub> Heterojunctions in Control of Optoelectronic Performances and Energy Conversion Efficiencies. *ACS Photonics* **2020**, 7 (10), 2886-2895.
6. Afzal, A. M.; Javed, Y.; Akhtar Shad, N.; Iqbal, M. Z.; Dastgeer, G.; Munir Sajid, M.; Mumtaz, S., Tunneling-based rectification and photoresponsivity in black phosphorus/hexagonal boron nitride/rhenium diselenide van der Waals heterojunction diode. *Nanoscale* **2020**, 12 (5), 3455-3468.
7. Afzal, A. M.; Iqbal, M. Z.; Dastgeer, G.; Nazir, G.; Eom, J., Ultrafast and Highly Stable Photodetectors Based on p-GeSe/n-ReSe<sub>2</sub> Heterostructures. *ACS Appl Mater Interfaces* **2021**, 13 (40), 47882-47894.
8. Li, K.; Du, C.; Gao, H.; Yin, T.; Zheng, L.; Leng, J.; Wang, W., Ultrafast and Polarization-Sensitive ReS<sub>2</sub>/ReSe<sub>2</sub> Heterostructure Photodetectors with Ambipolar Photoresponse. *ACS Appl Mater Interfaces* **2022**.
9. Tian, X.; Liu, Y., Van der Waals heterojunction ReSe<sub>2</sub>/WSe<sub>2</sub> polarization-resolved photodetector. *Journal of Semiconductors* **2021**, 42 (3), 032001.
10. Jaffery, S. H. A.; Dastgeer, G.; Hussain, M.; Ali, A.; Hussain, S.; Ali, M.; Jung, J., Near-Direct Band Alignment of MoTe<sub>2</sub>/ReSe<sub>2</sub> Type-II p-n Heterojunction for Efficient VNIR Photodetection. *Advanced Materials Technologies* **2022**, 2200026.
11. Elahi, E.; Khan, M. F.; Rehman, S.; Khalil, H. M. W.; Rehman, M. A.; Kim, D. K.; Kim, H.; Khan, K.; Shahzad, M.; Iqbal, M. W.; Basit, M. A.; Khan, F., Enhanced electrical and broad spectral (UV-Vis-NIR) photodetection in a Gr/ReSe<sub>2</sub>/Gr heterojunction. *Dalton Trans* **2020**, 49 (29), 10017-10027.
